1           **Development of an integrated structural biology platform specialized for sub-100 kDa**  
2           **protein complexes to support biologics discovery and rational engineering**

3           Yuri Iozzo\*, Yu Qiu, Albert Xu, Anna Park, Maria Wendt, Yanfeng Zhou\*

4           Large Molecules Research Platform, Sanofi US, 49 New York Ave, Framingham, MA 01701

5

6           \*Corresponding authors: [Yuri.Iozzo@sanofi.com](mailto:Yuri.Iozzo@sanofi.com) or [Yanfeng.Zhou@sanofi.com](mailto:Yanfeng.Zhou@sanofi.com)

7

8

9

10 **Abstract**

11 Developing a biologic medicine requires successful decision making at each step of selection,  
12 optimization, and/or combination of the right candidates at early research stages. Knowing the  
13 structural information and binding pattern between drug target and discovery candidates greatly  
14 increases the possibility of success. With the cryo-EM resolution revolution and rapid  
15 development of computational software, we have evaluated and integrated different tools in  
16 structural biology and the computation field and established a highly cost-effective platform,  
17 which allows us to obtain fast and accurate structural information for biologics projects with a  
18 close to 100% success rate and as fast as weeks turn-around time. Here we report four case studies  
19 selected from over 40 different protein structures and share how we integrate cryo-EM structure  
20 determination, computational structure modeling, and molecular dynamics simulation. With  
21 proper decision making and strategic planning, the platform allows us to obtain quality results  
22 within days to weeks, including sub-100 kDa complexes which are usually considered as a  
23 challenge due to their small size. Our utilization of this differential approach and use of multiple  
24 software packages, allows to manage priorities and resources to achieve goals quickly and  
25 efficiently. We demonstrate how to effectively overcome particle orientation bias by altering  
26 complex composition. In several of our examples, we use glycan density to facilitate  
27 interpretation of low-resolution 3D reconstruction and epitope mapping. Protein information  
28 plays an important role in our cryo-EM projects, especially in cases where we see significant  
29 challenges in obtaining high-resolution 3D maps.

## 30 Introduction

31 Biologic drug molecules have gained a large market share and delivered various treatments to  
32 previously undruggable diseases. Due to the high molecular complexity and specificity of  
33 biologics, availability of a high-resolution structure in early research phase is crucial for in-depth  
34 understanding of the mechanism of action of a candidate, molecule design, mitigation of  
35 developability risks. Rapidly developing in silico maturation techniques also heavily rely on the  
36 structure availability [1-4].

37 X-ray crystallography has been and remains a staple structural biology tool in pharmaceutical  
38 research and rational drug design due to its ability to achieve atomic resolution and due to  
39 availability of light sources [5]. Particularly, thousands of structures of Fabs and heavy chain  
40 variable domain of a heavy chain antibody ( $V_{HH}$ ) in complexes with antigens are available in  
41 Protein Data Bank. However, unpredictable success rates in crystallography call into question if  
42 the method can be reliably used on its own for biologic drug discovery needs, which usually  
43 require high success rates and fast turn-around times. In addition, large amounts of well-  
44 designed protein fragments are required for crystallization screenings, leading to staggering costs  
45 and overextended timelines. Finally, X-ray structure does not guarantee its full biological  
46 relevance due to crystal contacts [6] and the presence of solvents and polymers.

47 The cryo-EM resolution revolution took off in 2013 with the advent of direct electron detectors  
48 and new data processing approaches [7]. Since then, the method quickly evolved and became a  
49 staple tool in drug discovery [8-10]. Advantages of cryo-EM include the elimination of lengthy  
50 crystallization attempts and the uncertainty of obtaining well-diffracting crystals. Cryo-EM yields  
51 a structure, free of crystal contacts, from molecules in near-physiological conditions. Although,  
52 the method is mostly successful in molecules with rather large molecular weight, cryo-EM has  
53 steadily demonstrated success in the sub-MDa range, eventually crossing the 100 kDa threshold  
54 [11, 12]. Many structures or structure ensembles, unsuccessfully sought after with X-ray  
55 crystallography, were solved by cryo-EM [13-17]. In biologics research, a broad range of  
56 complexes, such as antigens bound to Fabs or multiple  $V_{HH}$ , are typically close to or heavier than  
57 100 kDa and, thus, are suitable targets for cryo-EM [18].

58 In this article we discuss cryo-EM results of four soluble complexes (size range 65-200 kDa) and  
59 share our learnings from over forty antigen-antibody (or  $V_{HH}$ ) structures solved for various  
60 biologics project needs. Such complexes were assembled from soluble proteins or fragments of  
61 cell surface receptors and Fab(s) or  $V_{HH}$ . We demonstrate how an integrated and optimized  
62 structural biology pipeline (Fig. 1, Table 1) can efficiently deliver structural information for sub-  
63 100 kDa complexes and advance projects, with close to 100% success rates and weeks of turn-  
64 around time. In addition, we also discuss common problems we have encountered.

65

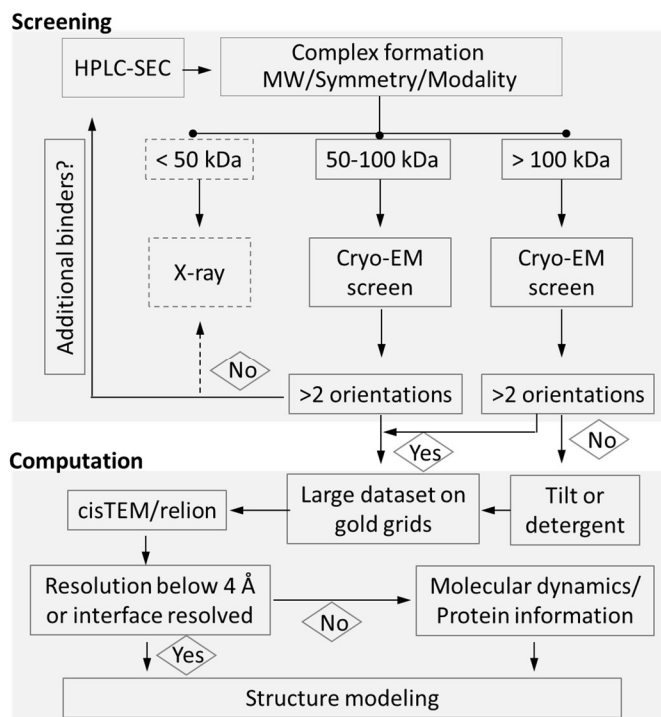

66

67 **Figure 1. Flowchart showing the structural biology decision process.** For complexes above 100  
 68 kDa, cryo-EM is the primary structure determination method. For smaller complexes, intrinsic  
 69 antigen features like oligomerization and glycosylation are first considered during method  
 70 selection. Symmetry greater than C1 usually leads to successful structure determination via  
 71 single particle cryo-EM. If mitigation of strong preferred orientation for 50-100 kDa complexes  
 72 fail, then crystallography is employed. Molecular dynamics simulation helps to resolve clashes  
 73 and to relax the structure if cryo-EM resolution is lower than 4 Å.

74 **Table 1. Summary of the case study.**

| Project                              | Resolution, Å | Symmetry     | MW*, complex (w/o glycans) | Glycan | Software pipelines | Application of structures                                    |
|--------------------------------------|---------------|--------------|----------------------------|--------|--------------------|--------------------------------------------------------------|
| Antigen A, Fab A                     | 3.6           | C3 (trimer)  | 140-200 kDa                | No     | cisTEM             | Developability engineering, MoA** elucidation                |
| Antigen B, V <sub>H1</sub> B1 and B2 | 3.4           | C1 (monomer) | 80-90 kDa                  | Yes    | cisTEM, Relion     | Epitope-Paratope, MoA elucidation, multispecific design      |
| Antigen C, Fab C                     | 4.8           | C1 (monomer) | 105-110 kDa                | Yes    | cisTEM             | Epitope identification, MoA elucidation, affinity alteration |
| Antigen D, Fab D                     | 8-10          | C1 (monomer) | 60-70 kDa                  | Yes    | cisTEM             | Epitope identification, MoA elucidation                      |

75 \*MW – molecular weight

76 \*\*MoA – mode of action

## 77 Results and Discussion

78 Requests for structural information of biologic candidates are diverse and, thus, can be filled  
 79 flexibly in terms of deliverables. This contrasts with a mandatory need for atomic resolution for  
 80 small molecule targets. Questions for biologic molecules include mode of action elucidation,  
 81 binding orientation, epitope-paratope identification, affinity alteration, developability risk

82 mitigation, etc. A promptly delivered medium-low resolution cryo-EM map, with the added  
83 support of computational structure modeling tools, may be sufficient to reveal candidate-antigen  
84 relative orientation and, often, to map the epitope-paratope interface. The following sections will  
85 focus on how we were able to deliver structural biology information of antigen-Fab/V<sub>HH</sub>  
86 complexes, without a critical dependence on high resolution.

## 87 **1. Optimized workflow for sub-100 kDa biologics complexes**

### 88 **1.1. Sample preparation**

89 Use of commercial antigen materials saves a significant amount of resources. An increasing  
90 number of antigen proteins are available from different vendors, often, with fusion tags for  
91 bioassays. In contrast to crystallography, tags, such as flag or strep are well tolerated by cryo-EM.  
92 Obtaining an antigen from a commercial stock can save months of protein production efforts.

93 After a complex is formed and purified via size exclusion chromatography (SEC), sample grids  
94 are prepared from the purified complex using the Vitrobot system. Instead of going through time-  
95 consuming pH/buffer screening, a standard set of four screening buffers is used, which is suitable  
96 for most of our samples: each buffer contains NaCl and a buffering component (HEPES,  
97 Imidazole or Tris) with pH adjusted to 7.0, 7.5, 8.0 and 8.5 (see Methods). While these buffers may  
98 be sub-optimal for some samples, a limited number of screening buffers speeds up turnaround  
99 time to obtain the structure for most samples. Buffer or complex composition can be modified if  
100 severe preferred orientation is observed in 2D class averages (see more in sections 2.2., 2.4.).

101 Sample concentration is a critical factor to achieve an appropriate particle distribution on grids.  
102 Therefore, a range of concentrations is utilized in the first round of grid screening. It is worth  
103 noting that starting concentration of 0.1-0.2 mg/ml has proved to be a “sweet spot” for complexes  
104 and grids we use (UltrAuFoil, C-flat).

### 105 **1.2. Grid screening without prior negative staining**

106 The workflow is simplified by removing negative staining analysis of particles. Results from  
107 negative stained samples tend to fail to predict the particles’ optimization matrix under cryo-EM  
108 conditions or take as much time as screening and optimizing cryo-EM grids directly.

109 Two grid types, C-flat and UltrAuFoil, are preferred for water soluble biologics complexes. When  
110 a sample requires an extensive screening or the apparent size of a complex is large enough to  
111 produce a good signal to noise ratio, cost-effective C-flat grids are selected. However, when  
112 dealing with complexes smaller than 100 kDa, gold (UltrAuFoil) grids [19] are the first choice,  
113 and have proven to be most robust and reproducible in our pipeline, providing thin and stable  
114 ice. There are many other choices of grids, for example, coated with thin carbon or graphene  
115 oxide, however, these grids create high background noise or other challenges [20].

116 Mailing-out grids for screening and data acquisition at external providers greatly expedites the  
117 turn-around time. Because many target complexes fall into a size of around 100 kDa or below,

118 only high-magnification capable Talos Arctica and Titan Krios microscopes equipped with a  
119 direct-electron camera are chosen for screening. This setup allows evaluation of 1-2 complexes  
120 within a single 24-hours instrument shift, including time for multiple grids screening and  
121 collection of two data sets.

### 122 **1.3. Map generation.**

123 In fast-pace research, extracting sufficient information as quickly as possible is, often, more  
124 valuable than pushing the data to highest resolution. With on-the-fly motion correction and cloud  
125 data sharing, cryo-EM data is available after a data collection session as quickly as receiving X-  
126 ray diffraction data from a synchrotron.

127 Our workflow enables us to immediately start data processing with cisTEM [21] to quickly assess  
128 overall data quality, perform 2D classification, and generate an *ab initio* maps within a day or two.  
129 Two of the main determining factors to successfully obtain a final map via cisTEM are complex  
130 size and acceptable diversity of particle orientation. In many cases, cisTEM generates a reasonable  
131 quality map for model fitting, especially when diverse particle orientations are present (Fig. 2).  
132 At this point, 4.5-5 Å resolution is usually enough to predict paratope/epitope information and  
133 key residues on the antigen-Fab (or antigen-V<sub>HH</sub>) interface. Generally, local resolution at the  
134 interface is better than global resolution, as the interface is usually located near to the center of  
135 the mass of the complex. Once enough side chains are resolved to determine their conformation,  
136 further attempts to improve resolution cease.

137 Data processing will continue with Relion [22] if a higher resolution map is required. Relion jobs  
138 require significantly more time than cisTEM, so they may be fed with one or more cisTEM  
139 outputs: (i) images of 2D class averages can be used as a template input for particle picking via  
140 Gautomatch [23] with subsequent importing of coordinates to Relion, (ii) after 2D classification,  
141 a refinement package can be exported from cisTEM in STAR format, and particle coordinates  
142 from the package can be used for particle re-extraction in Relion, (iii) if cisTEM yields a well-  
143 resolved *ab initio*, such a map can be used as a reference for 3D classification or 3D refinement in  
144 Relion.

145 If we fail to obtain a 4-5 Å or better map in the Relion workflow, typically due to preferred  
146 orientation or complex size, we return to a sample optimization step to optimize conditions on  
147 the grid or to change sample composition by adding new components, as described in section 2.2.

### 148 **1.4. Model building.**

149 Model building starts from rigid body fit of antigen, Fab, or V<sub>HH</sub> models in a map using Chimera  
150 [24]. For this purpose, Fab and V<sub>HH</sub> models are generated using MOE [25] Antibody Modeler.  
151 Framework regions of Fab and V<sub>HH</sub> models are mostly reliable due to strong structural  
152 conservation. Detailed conformations of CDRs can be determined later once the models are fit  
153 into a map based on framework regions. If antigen structure is not available from PDB, it can be



154 generated through homology modeling. Flexible antigen models are split into smaller domains  
155 to ensure a robust rigid body fit into a map.

156 Two methods of model refinement have been developed, with their use dependent on the map  
157 resolution. For high-resolution maps (better than  $\sim 4$  Å), rigid body fitted structures are further  
158 improved in Coot [26] via manual or automatic fit of CDRs and out-of-density regions.  
159 Subsequently, models are refined in Refmac [27] within CCPEM package [28]. For lower  
160 resolution maps (4-5 Å), final models are derived from rigid body fitted structures through  
161 molecular dynamics simulation in MDFF [29] and refinement in Refmac.

## 162 2. Representative Case studies

### 163 2.1. Antigen A with Fab A at 3.5 Å (trimer, C3 symmetry)

164 The first case study is a complex of Fab with a 15-20 kDa commercially available non-glycosylated  
165 antigen. The physiological trimer formation of antigen greatly increased the feasibility of utilizing  
166 cryo-EM on this target. In contrast to the tendency of preferred orientation in trimeric HA-Fab  
167 complexes [30], this complex showed diverse particle orientation on grids (Fig. 2a), although the  
168 overall shape of the complex is flat. The 3-fold symmetry (Fig. 2b, Fig. 2c) and various orientations  
169 allowed fast and straightforward 3D map generation (Fig. 2d) within a day of computation from  
170 a single data set.

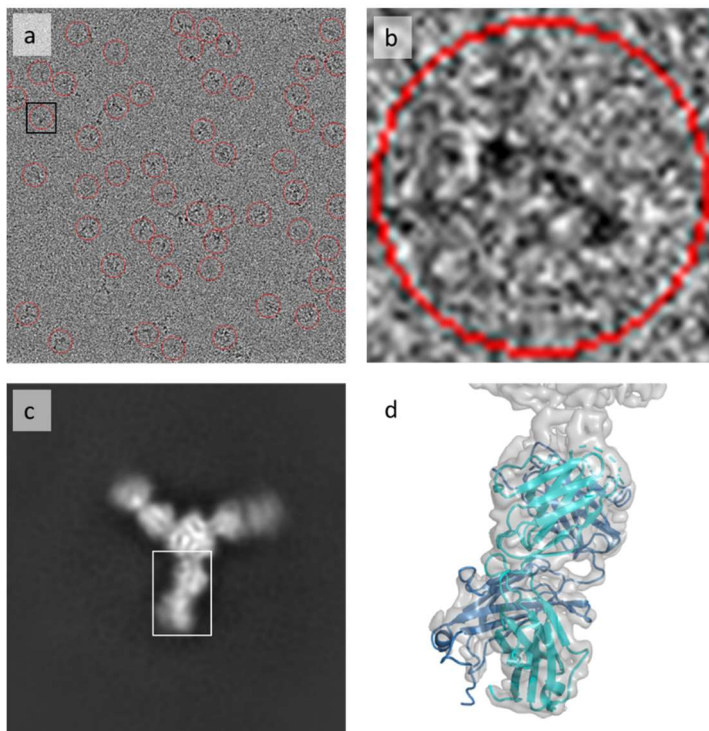

171

172 **Figure 2. Structure determination of antigen A complex with Fab A solved at 3.5 Å.** (a) A partial  
173 representative micrograph from Titan Krios microscope, equipped with K3 Summit camera.  
174 Particles picked by cisTEM are shown in red circles, the black square highlights the particle

175 shown in panel b. (b) A particle showing C3 symmetry. The particle represents the “top” view of  
176 the molecule. (c) A class average (“top” view), showing C3 symmetry, obtained after 2D  
177 classification of particles in cisTEM. Fab and antigen are clearly distinguishable. The white box  
178 highlights the approximate area on the 2D image corresponding to the partial map shown in  
179 panel d. (d) A fragment of the reconstructed map at 3.5 Å. The Fab A model was refined in  
180 Refmac. Antigen is not shown. CDRs are removed.

## 181 **2.2. Achievement of 3.4 Å resolution for 80-90 kDa complex (C1 symmetry)**

182 Here we present a strategy for antigens that are small and do not have intrinsic oligomerization  
183 features. Many biologics targets are monomeric proteins, and those targets commonly give severe  
184 (only one dominant view in 2D class averages) or mild (2 or 3 dominant views) preferred  
185 orientation. Any skewed reconstruction due to preferred orientation will likely lead to clash of  
186 coordinates around the antigen-Fab/  $V_{HH}$  interface during model building and raise challenges  
187 when identifying and interpreting the epitope-paratope interactions.

188 A high-resolution structure was needed for target B with  $V_{HH}$  B1. The monomeric antigen is 60-  
189 65 kDa and heavily glycosylated, resulting 10-15 kDa attributed to attached glycans.  $V_{HH}$  B1 is  
190 roughly 13 kDa.

191 A complex of antigen B with  $V_{HH}$  B1 was placed on C-flat grids and data was collected using a  
192 Titan Krios microscope. Very few 2D orientations were observed; however, high resolution  
193 features were clearly resolved, including easily distinguishable glycans and orientations of beta  
194 sheets. Multiple attempts to generate a meaningful *ab initio* reconstruction failed. To overcome  
195 the preferred orientation problem, the same grid was again used to obtain another set of movies  
196 collected with 30° stage tilt and without it. 2D classification of “tilted” images presented fewer  
197 high-resolution details in 2D classes and did not provide large classes with additional views. The  
198 combined dataset only led to a 5 Å reconstruction map that appeared streaky and distorted in  
199 one dimension. As a result, the rigid body fitted antigen and  $V_{HH}$  clashed so much around the  
200 interface that only the relative orientation of  $V_{HH}$  could be revealed. Exact epitope information as  
201 well as details of antigen-  $V_{HH}$  interface remained elusive.

202 From the same  $V_{HH}$  discovery campaign a second  $V_{HH}$ , B2, was characterized as a different epitope  
203 binder. We reasoned that addition  $V_{HH}$  B2 (MW roughly 18 kDa, including 5 kDa attributed to the  
204 flexible C-terminal tag) to the complex would increase molecular weight and change properties  
205 of the complex to overcome the preferred orientation issue. cisTEM 2D classification of the data  
206 set collected from UltrAuFoil grids on a Titan Krios revealed classes showing high-resolution  
207 features of the complex. We observed 2D class averages corresponding to a view (Fig. 3a), closely  
208 resembling the dominant views from the single  $V_{HH}$  complex. However, many class averages  
209 corresponded to new, more rare views (Fig. 3b). Despite that, only particles selected after multiple  
210 rounds of extensive 2D classification yielded a meaningful *ab initio* map. After refinement in  
211 cisTEM we have obtained the final 4 Å map with many helices,  $\beta$ -sheets, and side chains readily  
212 distinguishable. Models of both B1 and B2  $V_{HH}$  were placed and oriented confidently during the



213 rigid body fitting. Despite initial promise, the map demonstrated lower resolution in epitope  
214 areas and details of antigen- $V_{HH}$  interfaces remained enigmatic. Homology modeling of CDR H3  
215 for B2  $V_{HH}$  was not producing a conformation reminiscent of observed density, and the resolution  
216 of the map precluded manual placing of residues. The final cisTEM map did not address project  
217 needs. Due to the presence of high-resolution features in diverse 2D classes, we decided to spend  
218 time and resources to re-process the whole data set in Relion 3.0. The best twelve 2D class  
219 averages from cisTEM, representing diverse views, were used as a template to pick particles via  
220 Gautomatch. After one round of 2D classification in Relion, classes were selected very loosely,  
221 removing only obvious junk classes. Several rounds of 2D and 3D classification were performed  
222 subsequently, with classes being selected more conservatively. Generation of *ab initio* and  
223 subsequent 3D refinement yielded a 3.6 Å map. Still noisy, the map was clearly superior to 4 Å  
224 map from cisTEM. Bayesian polishing allowed an increase in resolution to 3.4 Å, and  
225 deepEMenhancer [31] processing of half-maps reduced most of the noise and provided a very  
226 good B-factor sharpening (Fig. 3c). The final map demonstrated density for a bulk of the side  
227 chains (Fig. 3d) and provided clear information about antigen and  $V_{HH}$  conformations, epitopes,  
228 and CDR H3 of  $V_{HH}$  B2.

229 Searching through EMDDB entries showed that, as of December 2020, this map sets a record of  
230 high resolution for a structure with C1 symmetry with a MW at or below 90 kDa.

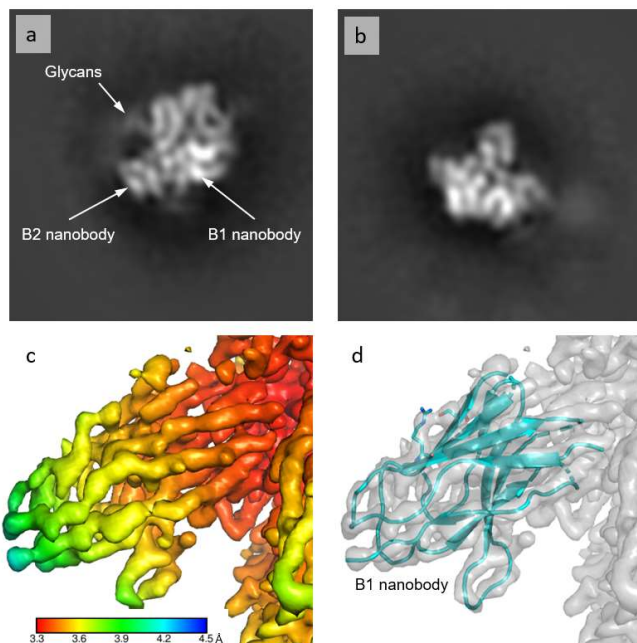

231

232 **Figure 3. Structure of antigen B bound to two  $V_{HH}$  at 3.4 Å.** (a) A 2D class average (horizontally  
233 flipped) representing a dominant view of the antigen B complex with two  $V_{HH}$ , B1 and B2,  
234 obtained after 2D classification of particles in cisTEM. Low resolution features, including  $V_{HH}$  and  
235 glycans, are clearly visible. (b) A 2D class average (horizontally flipped) representing a rare view  
236 of the antigen B complex with two  $V_{HH}$ , B1 and B2. (c) A fragment of the reconstructed map at 3.4

237 Å colored according to the local resolution. (d) Same map showing the model of V<sub>HH</sub> B1 with two  
238 residues shown as sticks to highlight the resolution. CDRs are removed from the model.

### 239 **2.3. Antigen C complex with Fab C at 4.8 Å resolution (C1 symmetry).**

240 In this case study, the complex was reconstituted from commercially available antigen C bound  
241 with Fab C and was put on C-flat grids. Two factors were screened sequentially: (i) buffer pH and  
242 composition and (ii) concentration of the complex. It appears that using imidazole buffer with  
243 pH 7.5 was critical for this sample, as all three other buffers produced aggregation on the grids.  
244 Complex concentration from 0.15 to 0.6 mg/ml did not dramatically affect the particle distribution  
245 on the grids; however, a higher (0.4-0.6 mg/ml) concentration was used for data collection because  
246 it seemed to produce more particles per micrograph (Fig. 4a). Notably, both thin and medium  
247 thickness area were checked during screening to find optimal area for data collection.

248 A small dataset containing ~750 movies was recorded from a Titan Krios and processed in  
249 cisTEM. After two rounds of 2D classification, high-resolution features became clearly  
250 distinguishable (Fig. 4b). However, particles demonstrated an orientation bias. Collecting an  
251 additional ~1,600 movies with a 30° stage tilt did not improve the results. A low-resolution map  
252 was obtained from the merged data sets, which did not address the project needs.

253 A larger conventional dataset of ~4,500 movies was collected in hopes of enriching 2D  
254 classification with rare views. After 2 rounds of 2D classification, remaining particles showed  
255 multiple orientations. Particles were exported to Relion 3.0 for 3D classification. A final 4.8 Å map  
256 was obtained after 3D refinement and post processing (Fig. 4c). It was sufficient to support model  
257 building and identification of epitope-paratope interactions. Due to its lower resolution, the final  
258 model was relaxed in MDFF before refinement in Refmac (Fig. 4d). The best data for this complex  
259 was always obtained from freshly prepared complex, thawing of a previously frozen sample for  
260 grid preparation led to low quality screening data.

261

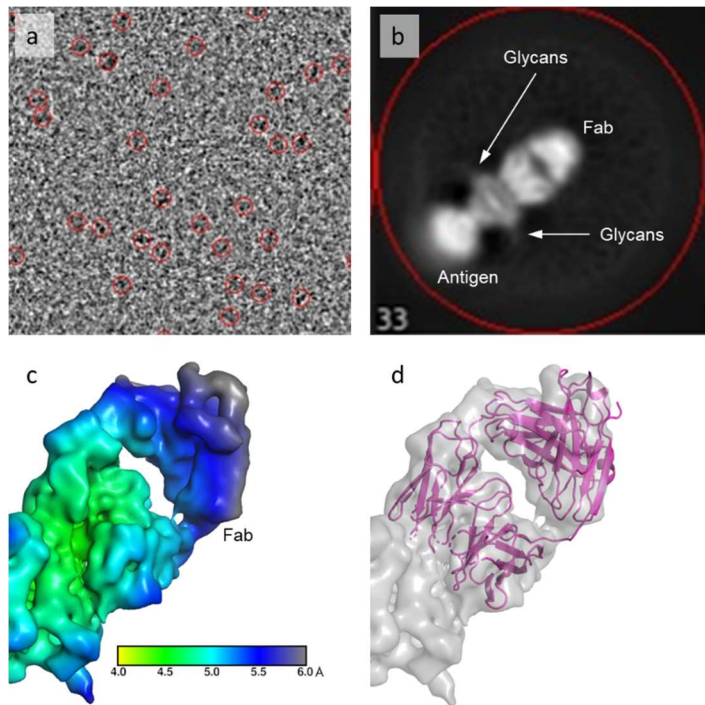

262

263 **Figure 4. Structure of antigen C bound to Fab C at 4.8 Å.** (a) A partial representative micrograph  
264 from a Titan Krios, equipped with K3 Summit camera, with particles picked in cisTEM (red  
265 circles). (b) A 2D class average showing Fab C bound to the antigen C. The distinct shape of the  
266 Fab as well as antigen glycans are clearly recognizable. (c) A fragment of the reconstructed map  
267 at 4.8 Å colored according to the local resolution. (d) The same map with Fab model refined into  
268 it in Refmac. Antigen is not shown. CDRs are removed.

#### 269 **2.4. Antigen D (20 kDa) complex with Fab D (C1 symmetry)**

270 This is one of the smallest monomeric complexes we have encountered. Molecular weight of the  
271 antigen D complex with Fab D is roughly 65 kDa. With foreseen difficulties, we tried cryo-EM for  
272 several reasons: (i) a non-glycosylated complex failed to produce crystals under a tight project  
273 timeline; (ii) insights about glycans of antigen D and their effect on the antibody binding were  
274 needed. Many approaches were attempted to overcome issues throughout the analysis and  
275 although only a low-resolution map was obtained at the end, the resulting map provided valuable  
276 information.

277 The cryo-EM work was started utilizing non-glycosylated antigen from a prior crystallography  
278 study. The non-glycosylated complex (0.15-0.3 mg/ml) was applied onto R2/2 C-flat grids. Like  
279 in previous cases, various pH, buffers, and protein concentrations were screened. Grid screening  
280 demonstrated that particle distribution is more uniform at pH 8.0-8.5, and protein concentration  
281 did not severely affect particle distribution. A dataset containing about ~3,800 movies was  
282 collected right after the screening. Over 1.4 million particles were picked and sorted by multiple  
283 rounds of 2D classification by cisTEM. However, only one dominant particle orientation was

284 revealed in the 2D class averages. Although there were some slightly rotated views available, 3D  
285 reconstruction was not successful.

286 A few commonly used strategies were then applied to improve the particle orientation: (i)  
287 changing sample composition from non-glycosylated to glycosylated antigen, (ii) adding  
288 detergent, (iii) stage tilting during data collection, (iv) changing sample buffer.

289 In solution, glycosylated proteins may behave differently compared to their non-glycosylated  
290 counterparts [32]. Glycans can also provide additional landmarks for structural modeling. A  
291 batch of grids with glycosylated antigen D was prepared utilizing UltrAuFoil grids. More than  
292 two million particles were picked from ~3,300 aligned movies. Although all three glycans were  
293 clearly seen, 2D classification revealed the same dominant views as observed in the non-  
294 glycosylated complex (Fig. 5a).

295 A few different orientations were obtained on UltrAuFoil grids after introducing detergents or  
296 stage tilting. With 30-40° stage tilting, more orientations emerged and, interestingly, represented  
297 mainly side views of the Fab (Fig. 5b). Addition of detergent, even at low concentration, produced  
298 a key orientation: viewing through the Fab doughnut hole (Fig. 5c). These additional views were  
299 necessary to calculate 3D reconstruction at low resolution (Fig. 5d).

300 We have used a publicly available structure of antigen D from Protein Data Bank and a MOE-  
301 generated Fab model to coarsely assign the epitope on antigen D guided by the glycans. The  
302 proposed model was improved by fitting into the low-resolution 3D volume. It has provided  
303 sufficient epitope information to advance this project. Therefore, the strategy of adding additional  
304 binders, described in section 2.2., was not explored in this case.

305 In this case, all attempts to obtain a high-resolution reconstruction failed, and we suspect that the  
306 signal to noise ratio in tilted or detergent data was significantly compromised and aggravated by  
307 the small size of this non-symmetric molecule. With lessons learned on this target, we find that  
308 for our sub-100 kDa complexes, once preferred orientation occurs, it is critical and effective to  
309 introduce additional binders to the target first before spending time on exploring detergent or  
310 collecting data with a tilted stage.

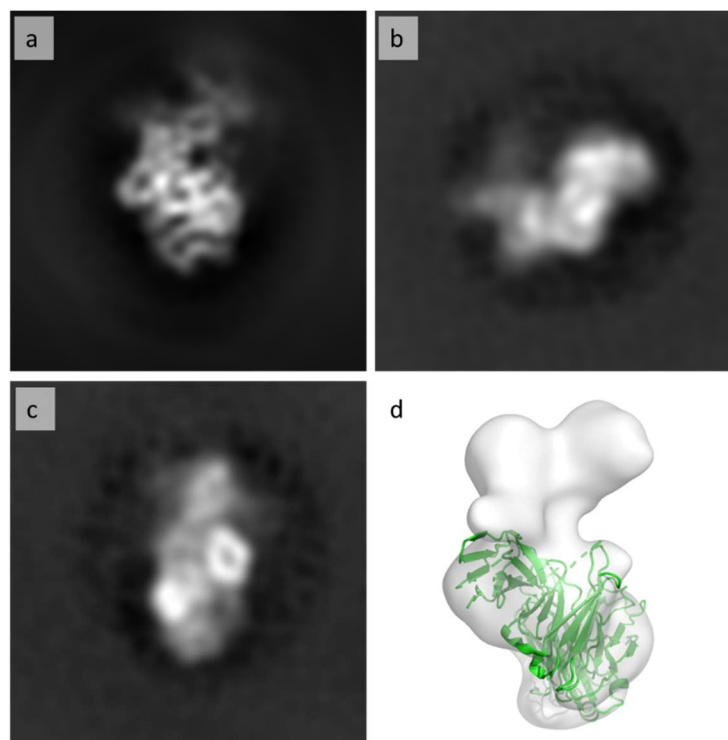

311

312 **Figure 5. Structure elucidation of antigen D bound to Fab D (>6 Å).** (a) A dominant particle  
313 view obtained after 2D classification of particles in cisTEM, present in all data sets. (b) A less-  
314 dominant particle view from a data set, collected in the presence detergent. (c) A less-dominant  
315 particle view from a data set, collected with a 30° stage tilt. (d) Final low-resolution map (>6 Å)  
316 with a Fab model, relaxed via MDFF. Antigen is not shown. CDRs are removed.

### 317 3. Methods

#### 318 3.1. Sample preparation

319 Antigens, antibodies, and V<sub>HH</sub> were purchased from commercial sources or purified internally.  
320 Antibodies were digested with FabULOUS or FabRICATOR enzymes (Genovis). Complexes were  
321 assembled in PBS at room temperature by incubating antigen with 1.2-1.5 molar excess of Fab or  
322 V<sub>HH</sub> for 45-60 minutes. In case of antigen B, the second V<sub>HH</sub>, B2, was added 45 minutes into the  
323 initial incubation, the resulting mixture was incubated for an additional 45 minutes at room  
324 temperature. Complexes were immediately purified through SEC (Superdex 200 Increase 10/300  
325 GL, Cytiva) on an Akta Basic (Cytiva) via isocratic elution in PBS using a 0.5 ml injection loop.  
326 Fractions, 0.25 ml each, were collected into 96 deep-well blocks. Fractions of the peak with the  
327 lowest retention time corresponded to a complex and were pooled together. Complexes were  
328 concentrated on Amicon 10-50 kDa cutoff 5 ml centrifugal filters (Millipore) to a volume of 100–  
329 250 µl. In some cases, the volume was further reduced with an Amicon 10 kDa cutoff 0.5 ml filters  
330 (Millipore) down to 50 µl. Complex concentration was measured via Nanodrop (Thermo Fisher)  
331 and varied in the range of 0.5-8.0 mg/ml. To make grids for initial screening, samples were diluted  
332 by one of the following four buffers: 20 mM HEPES, 150 mM NaCl pH 7.0; 20 mM imidazole, 150



333 mM NaCl pH 7.5; 20 mM Tris-HCl, 150 mM NaCl pH 8.0; 20 mM Tris-HCl, 150 mM NaCl pH 8.5.  
334 If the concentration of the complex in PBS was too low to dilute it at least 7-10 times with a buffer  
335 before grid making, then Amicon 10 kDa cutoff 0.5 ml centrifugal filters were used for buffer  
336 exchanging. Samples with a final concentration of 0.1-1.0 mg/ml were centrifuged for one minute  
337 at 14,000g. If a detergent was used, it was applied right before grid making by adding 20x  
338 detergent solution to the sample, mixing and centrifuging again. UltrAuFoil R0.6/1 and R1.2/1.3  
339 300 mesh (Quantifoil Micro Tools) and C-flat-2/2-2Au (Protochips) grids were used for grid  
340 making. Grids were glow-discharged at -20 or -25 mA for one minute using a PELCO easiGlow  
341 glow discharger (Ted Pella). 3-4  $\mu$ l of samples were applied onto grids using a Vitrobot (Thermo  
342 Fisher). Grids were blotted with "595" filter papers (Ted Pella) for 4-9 seconds with blot force 1-  
343 10 (higher blotting time and force for C-flat grids, lower for UltrAuFoil grids) at 85-100%  
344 humidity and then plunged into liquid ethane. Specific details for each complex are shown in the  
345 following paragraphs.

346 The complex with antigen A was formed by incubating the antigen with 1.5 molar excess of Fab  
347 for an hour at room temperature. It was purified via SEC and applied onto UltrAUfoil and C-Flat  
348 grids in different buffers with pH ranging from 7.0 to 8.5, as described above. The complex  
349 concentration on the grids varied in the range 0.1-1.0 mg/ml.

350 The complex of antigen B with the single  $V_{HH}$ , B1, after SEC purification, was applied onto C-flat  
351 grids at concentrations 0.2-0.4 mg/ml in all four buffers mentioned above. The complex with two  
352  $V_{HH}$  was prepared from the antigen and 1.5 molar excess of each  $V_{HH}$  (B2 was added 45 minutes  
353 after B1) and purified via SEC. The complex was diluted in four testing buffers to 0.15-0.8 mg/ml  
354 and then applied onto UltrAuFoil grids.

355 The complex with antigen C, was prepared with 1.5 molar excess of Fab C. After SEC purification,  
356 the complex was applied onto C-flat grids in four buffers (listed above) with the concentration  
357 ranging 0.15-0.6 mg/ml.

358 The complex of antigen D, prepared in a two-fold molar excess of Fab D, was purified via SEC  
359 and concentrated to ~8 mg/ml. It was then diluted in buffers, as described above, to 0.15-0.3  
360 mg/ml and used to prepare UltrAuFoil grids for screening and collection of the first data set. The  
361 second set of C-flat grids was prepared using same buffer (20 mM Tris, 150 mM NaCl pH 8.0)  
362 and complex concentration of 0.2 mg/ml for each grid, but with the following final concentrations  
363 of detergents added: 0.2 or 0.5 mM CTAB, 1 or 3 mM fluorinated fos-choline-8, 1 or 2.4 mM  $\beta$ -  
364 octylglucoside, 1 or 3 mM CHAPS.

### 365 **3.2. Grids screening and data acquisition**

366 We have access to Talos Arctica and Titan Krios microscopes (Thermo Fisher) equipped with K3  
367 Summit cameras (Gatan) and SerialEM software [33]. The Talos Arctica microscope is mainly  
368 used for grid screening. For most complexes, grid screening and data collection were performed  
369 on the Titan Krios within one microscope session. Data acquisition is performed via multi-hole



370 technique for R1.2/1.3 or smaller grids, or multi-hole and multi-shot approach for grids R2/2 or  
371 larger [17].

372 For the complex with antigen A and Fab A, a single data set of 3,771 movies was collected.

373 For the complex of antigen B with the single  $V_{HH}$ , B1, three data sets were collected from the C-  
374 flat grid with a complex concentration 0.2 mg/ml: 642 movies collected using a Volta phase plate  
375 [34], 1,911 movies collected using conventional technique and 1,847 movies collected with and  
376 without 30° stage tilt (mixed data set). For the complex of antigen B with two  $V_{HH}$ , a single data  
377 set was collected from the UltraAuFoil grid.

378 For the complex of antigen C with Fab C, three data sets were collected: a smaller data set of ~750  
379 movies, a data set containing ~2,350 movies collected with and without 30° stage tilt, and a large  
380 conventional data set with ~4,500 movies.

381 About 3,800 movies were collected for non-glycosylated antigen D bound to Fab D. A set of ~3,300  
382 movies was collected for the glycosylated complex. Later, more data sets were collected with a  
383 tilted stage and from the sample with detergent.

### 384 3.3. Data processing

385 Our cryo-EM partners provide motion correction on the fly through Relion or IMOD [35]. For  
386 early projects, we have directly imported IMOD-corrected movies for cisTEM processing.  
387 However, there are few problems (missing metadata, different motion-correction protocol) if  
388 Relion processing is required down the road. To avoid this, we now import only Relion motion-  
389 corrected images to cisTEM. Within cisTEM, the CTF estimation was done via default options.  
390 Particle picking required some optimization of maximum and characteristic particles radii. For  
391 all complexes, particles were picked at 15 Å resolution because using higher resolution for sub-  
392 200 kDa complexes often results in incorrectly picked particles. 2D classification, *ab initio* map  
393 generation, automatic refinement, and B-factor sharpening were done predominantly with  
394 default parameters (the hand was inverted, if needed, during the sharpening).

395 Data processing in Relion 3.0 was performed exactly as described in the software tutorial with  
396 the exception of particle picking. We run Relion on 8 GPUs and 30 threads. Particle positions were  
397 imported from cisTEM (for antigen C) or picked via Gautomatch v0.56 (for antigen B) using 12  
398 different templates showing different molecule projections, obtained from cisTEM-generated mrc  
399 files containing images of 2D class averages. These templates were extracted from mrc files using  
400 v2 and proc2d scripts from EMAN/EMAN2 [36]. If needed, final volumes were inverted through  
401 `relion_image_handler` and the '--invert\_hand' option. More details for each complex are provided  
402 below.

403 For antigen A and Fab A, after quick visual inspection, 1,019 motion-correct images were  
404 removed due to excessive drift, icing, or unacceptable FFT. In hindsight, this step appears to be  
405 unnecessary. Resulting MRC images were imported to cisTEM, CTF was determined, and

406 particles were picked. Several rounds of 2D classification led to selection of the best classes  
407 showing many expected structural features of the complex (Fig. 2c). Both *ab initio* reconstruction  
408 and Auto 3D refinement were performed in C1 symmetry, yielding a 4.1 Å map. Subsequently,  
409 the map was refined again but with C3 symmetry, which improved the resolution to 3.5 Å.

410 For the antigen B complex with B1 V<sub>HH</sub>, the Volta phase plate failed to produce quality results  
411 and was discarded. The second conventional data set demonstrated preferred orientation, which  
412 was not dramatically resolved by using 30° stage tilt in the third data set. *Ab initio* was obtained  
413 from the third set, and the final map demonstrated 5 Å resolution. For antigen B complex with  
414 two V<sub>HH</sub>, 2D class averages were obtained in cisTEM and used as Gautomatch templates. Further  
415 processing was done in Relion. The final 3.4 Å map (before the postprocessing stage) was  
416 processed via deepEMenhancer from two half-maps using the highRes option to sharpen B-factor  
417 and remove noise.

418 For antigen C, all three data sets were processed in cisTEM. The first two were eventually  
419 discarded. For the third and largest data set of ~4,500 movies, two rounds of 2D classification  
420 were performed in cisTEM, after which ~420,000 particles were exported to Relion 3.0 for 3D  
421 classification. The final 4.8 Å map was reconstructed after 3D refinement and post processing  
422 from ~240,000 particles (Fig. 4c).

423 For antigen D, high quality 2D class averages (Fig. 5a) and a meaningful low-resolution map (Fig.  
424 5b) were obtained from the second data set (the conventionally collected data for the glycosylated  
425 complex). The rest of the data was discarded because it failed to provide any improvement.

### 426 **3.4. Model building and refinement**

427 For all complexes described in this manuscript, antigen models were obtained from Protein Data  
428 Bank. For projects not described in this manuscript, where such models were not available, we  
429 have obtained a homology model in MOE using structures closest known homologs. All Fab and  
430 V<sub>HH</sub> models were generated in MOE Antibody Modeler. All models were fit as rigid bodies into  
431 their corresponding maps in Chimera. CDRs and out-of-density antigen loops were manually fit  
432 into maps in Coot. For antigens A, B, and C, final models were refined in Refmac within the  
433 CCPEM package. For antigen D, the rigid body fit was obtained using Molrep [37] from the  
434 CCPEM package. Glycans and other structural features of the complex, clearly visible on 2D class  
435 averages, were used as landmarks via a proprietary method. For the complex with antigen C,  
436 molecular dynamics simulations for 50 ns in MDFF preceded the refinement in Refmac due to the  
437 lower resolution of the map. MDFF calculations were performed as described in the tutorial. No  
438 refinement of molecular dynamics simulations was performed for complex with antigen D.

### 439 **Conclusions**

440 Delivering high quality cryo-EM structures for small sized complexes at sub-100 kDa range  
441 requires an optimized workflow with strategic decision making, especially when preferred  
442 orientation occurs. Here, we shared a few representative cases to demonstrate how cryo-EM can

443 be routinely applied to reveal details of epitope-paratope interface quickly and reliably and  
444 support broad project needs. Coupled with strong computational structure modeling, we were  
445 able to extract accurate structural information using this workflow from less optimized cryo-EM  
446 maps within a short time. The workflow turns out to be much more effective compared to  
447 spending time and resources to improve resolution. In our work, we tried to overcome preferred  
448 orientation by applying commonly used techniques developed for large sized targets, however,  
449 for particles in the sub-100 kDa size range, we observed that preferred orientation has to be  
450 resolved through new complex formation, such as adding additional Fab,  $V_{HH}$ , or another  
451 binding partner to a complex as shown in the case study for antigen B. In extremely challenging  
452 cases, knowledge of glycosylation and protein features of antigens can provide critical guidance  
453 to get meaningful structural information when high resolution 3D volume reconstruction is not  
454 feasible.

455

### 456 **Acknowledgments**

457 We want to thank cryo-electron microscopy facilities of University of Massachusetts,  
458 Harvard Medical School, University of Michigan for their help with sample screening  
459 and data acquisition; and Robert Cost for proofreading our draft and providing valuable  
460 comments.

## 461 References

- 462 1. Clark, L.A., et al., *Affinity enhancement of an in vivo matured therapeutic antibody using*  
463 *structure-based computational design*. Protein Sci, 2006. **15**(5): p. 949-60.
- 464 2. Lippow, S.M., K.D. Wittrup, and B. Tidor, *Computational design of antibody-affinity improvement*  
465 *beyond in vivo maturation*. Nat Biotechnol, 2007. **25**(10): p. 1171-6.
- 466 3. Sulea, T., et al., *Application of Assisted Design of Antibody and Protein Therapeutics (ADAPT)*  
467 *improves efficacy of a Clostridium difficile toxin A single-domain antibody*. Sci Rep, 2018. **8**(1): p.  
468 2260.
- 469 4. Cannon, D.A., et al., *Experimentally guided computational antibody affinity maturation with de*  
470 *novo docking, modelling and rational design*. PLoS Comput Biol, 2019. **15**(5): p. e1006980.
- 471 5. Maveyraud, L. and L. Mourey, *Protein X-ray Crystallography and Drug Discovery*. Molecules,  
472 2020. **25**(5).
- 473 6. Luo, J., et al., *A structural dissection of large protein-protein crystal packing contacts*. Sci Rep,  
474 2015. **5**: p. 14214.
- 475 7. Grigorieff, N., *Direct detection pays off for electron cryo-microscopy*. Elife, 2013. **2**: p. e00573.
- 476 8. Van Drie, J.H. and L. Tong, *Cryo-EM as a powerful tool for drug discovery*. Bioorg Med Chem Lett,  
477 2020. **30**(22): p. 127524.
- 478 9. Renaud, J.P., et al., *Cryo-EM in drug discovery: achievements, limitations and prospects*. Nat Rev  
479 Drug Discov, 2018. **17**(7): p. 471-492.
- 480 10. Armache, J.P. and Y. Cheng, *Single-particle cryo-EM: beyond the resolution*. Natl Sci Rev, 2019.  
481 **6**(5): p. 864-866.
- 482 11. Subramaniam, S., *The cryo-EM revolution: fueling the next phase*. IUCrJ, 2019. **6**(Pt 1): p. 1-2.
- 483 12. Lyumkis, D., *Challenges and opportunities in cryo-EM single-particle analysis*. J Biol Chem, 2019.  
484 **294**(13): p. 5181-5197.
- 485 13. Amunts, A., et al., *Ribosome. The structure of the human mitochondrial ribosome*. Science, 2015.  
486 **348**(6230): p. 95-98.
- 487 14. Hang, J., et al., *Structural basis of pre-mRNA splicing*. Science, 2015. **349**(6253): p. 1191-8.
- 488 15. Liao, M., et al., *Structure of the TRPV1 ion channel determined by electron cryo-microscopy*.  
489 Nature, 2013. **504**(7478): p. 107-12.
- 490 16. Svidritskiy, E., et al., *Structures of yeast 80S ribosome-tRNA complexes in the rotated and*  
491 *nonrotated conformations*. Structure, 2014. **22**(8): p. 1210-1218.
- 492 17. Svidritskiy, E., et al., *Extensive ribosome and RF2 rearrangements during translation termination*.  
493 Elife, 2019. **8**.
- 494 18. Wu, S., et al., *Fabs enable single particle cryoEM studies of small proteins*. Structure, 2012. **20**(4):  
495 p. 582-92.
- 496 19. Russo, C.J. and L.A. Passmore, *Ultrastable gold substrates: Properties of a support for high-*  
497 *resolution electron cryomicroscopy of biological specimens*. J Struct Biol, 2016. **193**(1): p. 33-44.
- 498 20. Sgro, G.G. and T.R.D. Costa, *Cryo-EM Grid Preparation of Membrane Protein Samples for Single*  
499 *Particle Analysis*. Front Mol Biosci, 2018. **5**: p. 74.
- 500 21. Grant, T., A. Rohou, and N. Grigorieff, *cisTEM, user-friendly software for single-particle image*  
501 *processing*. Elife, 2018. **7**.
- 502 22. Scheres, S.H., *RELION: implementation of a Bayesian approach to cryo-EM structure*  
503 *determination*. J Struct Biol, 2012. **180**(3): p. 519-30.
- 504 23. Zhang, K., M. Li, and F. Sun, *Gautomatch: an efficient and convenient gpu-based automatic*  
505 *particle selection program*. 2011.
- 506 24. Pettersen, E.F., et al., *UCSF Chimera--a visualization system for exploratory research and*  
507 *analysis*. J Comput Chem, 2004. **25**(13): p. 1605-12.

- 508 25. Vilar, S., G. Cozza, and S. Moro, *Medicinal chemistry and the molecular operating environment*  
509 *(MOE): application of QSAR and molecular docking to drug discovery*. *Curr Top Med Chem*, 2008.  
510 **8**(18): p. 1555-72.
- 511 26. Emsley, P. and K. Cowtan, *Coot: model-building tools for molecular graphics*. *Acta Crystallogr D*  
512 *Biol Crystallogr*, 2004. **60**(Pt 12 Pt 1): p. 2126-32.
- 513 27. Murshudov, G.N., et al., *REFMAC5 for the refinement of macromolecular crystal structures*. *Acta*  
514 *Crystallogr D Biol Crystallogr*, 2011. **67**(Pt 4): p. 355-67.
- 515 28. Wood, C., et al., *Collaborative computational project for electron cryo-microscopy*. *Acta*  
516 *Crystallogr D Biol Crystallogr*, 2015. **71**(Pt 1): p. 123-6.
- 517 29. Trabuco, L.G., et al., *Flexible fitting of atomic structures into electron microscopy maps using*  
518 *molecular dynamics*. *Structure*, 2008. **16**(5): p. 673-83.
- 519 30. Tan, Y.Z., et al., *Addressing preferred specimen orientation in single-particle cryo-EM through*  
520 *tilting*. *Nat Methods*, 2017. **14**(8): p. 793-796.
- 521 31. Zhu, Y., Q. Ouyang, and Y. Mao, *A deep convolutional neural network approach to single-particle*  
522 *recognition in cryo-electron microscopy*. *BMC Bioinformatics*, 2017. **18**(1): p. 348.
- 523 32. Sola, R.J. and K. Griebenow, *Effects of glycosylation on the stability of protein pharmaceuticals*. *J*  
524 *Pharm Sci*, 2009. **98**(4): p. 1223-45.
- 525 33. Mastronarde, D.N., *Automated electron microscope tomography using robust prediction of*  
526 *specimen movements*. *J Struct Biol*, 2005. **152**(1): p. 36-51.
- 527 34. Danev, R., et al., *Volta potential phase plate for in-focus phase contrast transmission electron*  
528 *microscopy*. *Proc Natl Acad Sci U S A*, 2014. **111**(44): p. 15635-40.
- 529 35. Kremer, J.R., D.N. Mastronarde, and J.R. McIntosh, *Computer visualization of three-dimensional*  
530 *image data using IMOD*. *J Struct Biol*, 1996. **116**(1): p. 71-6.
- 531 36. Tang, G., et al., *EMAN2: an extensible image processing suite for electron microscopy*. *J Struct*  
532 *Biol*, 2007. **157**(1): p. 38-46.
- 533 37. Vagin, A. and A. Teplyakov, *Molecular replacement with MOLREP*. *Acta Crystallogr D Biol*  
534 *Crystallogr*, 2010. **66**(Pt 1): p. 22-5.

535
